# Supplementary material
Source: Springer Nature journal article supplement (https://www.springermedizin.de/resource/supplementary/12874_2010_467_MOESM2_ESM.pdf/9432154)

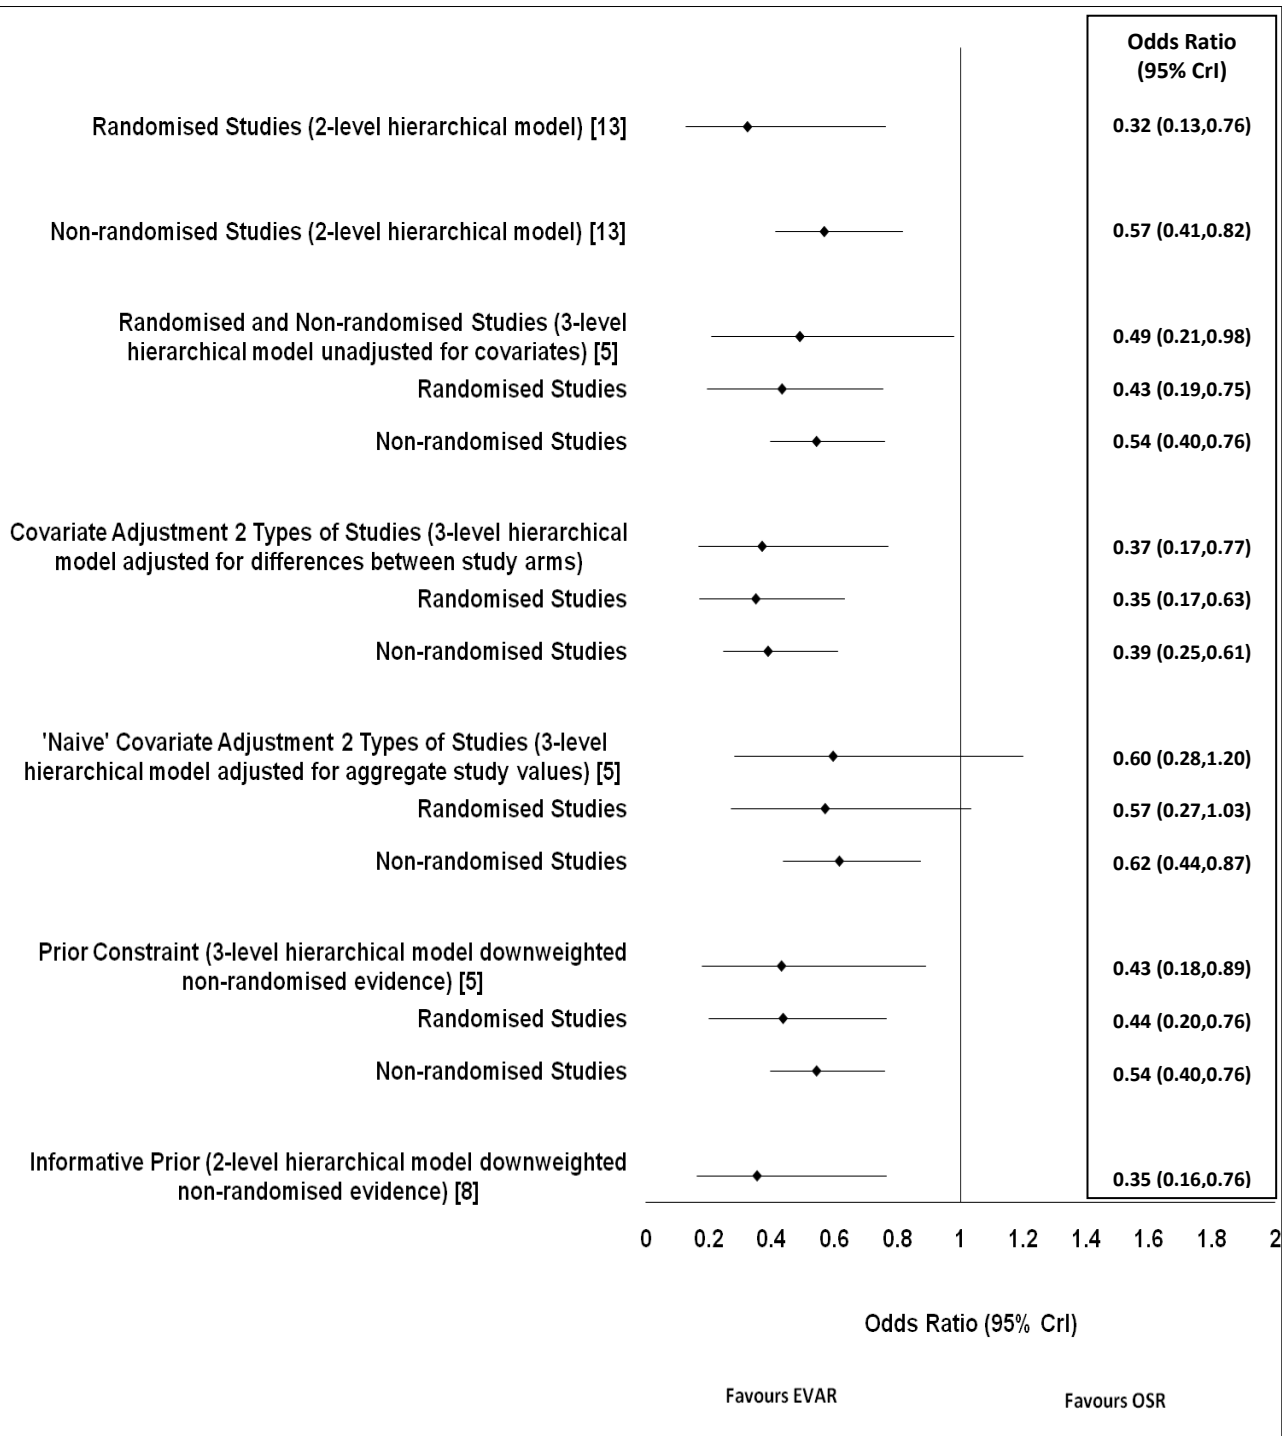

Supplement: MOESM2 [file 9432154]
